# Supplementary material for: Functional Genomics Approaches to Elucidate Vulnerabilities of Intrinsic and Acquired Chemotherapy Resistance
Source: Cells. 2021 Jan 28;10(2):260. doi: 10.3390/cells10020260 (PMC7912423; doi:10.3390/cells10020260)
Supplement: Supplementary file 1 [file cells-10-00260-s001.xlsx]

## Sheet: Sheet1
Mode of action	Drug class	Author, Year	PMID	Chemotherapy (C) or Targeted Therapy (T)	Drug	Type of library	Cancer type	Model	Hits
Alkylating agents	Platinum-based agents	Planells-Cases, 2015	26530471	C	Carboplatin	Gene trap	CML	KBM7	LRRC8D/LRRC8A (components of the volume regulated anion channel)
Alkylating agents	Platinum-based agents	Bartz, 2006	17000754	C	Cisplatin	RNAi	Cervical, NSCL, ovarian cancers	HeLa, A549, TOV21G	BRCA1, BRCA2, RAD51, SHFM1,TP53
Alkylating agents	Platinum-based agents	Guerreiro, 2011	21652733	C	Cisplatin	RNAi	Medulloblastoma	DAOY	ATR, LYK5, MPP2, PIK3CG, PIK4CA, WNK4
Alkylating agents	Platinum-based agents	Ko, 2019	30844312	C	Cisplatin	CRISPR	Melanoma	A375	ZNRF3
Alkylating agents	Platinum-based agents	MacKay, 2014	24686174	C	Cisplatin	RNAi	Osteosarcoma, colorectal, cervical, prostate, breast, ovarian cancers	U2OS, HCT116, HeLa, PC3, ZR75.1, MDA-MB-231, PEA1	HOIP
Alkylating agents	Platinum-based agents	Yamanoi, 2016	27323405	C	Cisplatin	RNAi	Ovarian	OVCA420	ABHD2
Alkylating agents	Platinum-based agents	Guillemette, 2015	25737278	C	Cisplatin	RNAi	Ovarian	PEO1	CHD4
Alkylating agents	Platinum-based agents	Goodspeed, 2019	30414698	C	Cisplatin	CRISPR	Bladder cancer	MGHU4 and 253J bladder cancer cell lines	MSH2
Alkylating agents	Platinum-based agents	Xu, 2020	31694888	C	Cisplatin	CRISPR	Malignant pleural mesothelioma	MESO-1 cells	WEE1
Alkylating agents	Platinum-based agents	Combes, 2019	30987998	C	Oxaliplatin	CRISPR	Colorectal	HCT-116-R1	ATR
Topoisomerase Inhibitors	Topoisomerase II inhibitor	Wijdeven, 2015	26260527	C	Doxorubicin	Gene trap		HAP1	ABCB1, Keap1, SWI/SNF subunits, C9Orf82, Eif4a1
Topoisomerase Inhibitors	Topoisomerase II inhibitor	Wang, 2014	24336569	C	Etoposide	CRISPR	CML	HL60, KBM7	TOP2A, CDK6
Topoisomerase Inhibitors	Topoisomerase II inhibitor	Palmer, 2019	31742555	C	R-CHOP	CRISPR	Diffuse large B-cell lymphomas	SU-DHL-4, SU-DHL-6	ABCC1, ABCG2, and ABCB1, TOP2
Topoisomerase Inhibitors	Topoisomerase II inhibitor	Burgess, 2008	18574145	C	Doxorubicin	RNAi	Lymphoma	p19ARF−/−;Eμ-Myc lymphoma cells,	TOP2A
Topoisomerase Inhibitors	Topoisomerase II inhibitor	Rafiee, 2019	Poster abstract	C	Etoposide	CRISPR	CML	K562	ABCC1, RAD54L2
Topoisomerase Inhibitors	Topoisomerase II inhibitor	Borys, 2020	32005150	C	Doxorubicin	CRISPR	Renal cell adenocarcinoma	769P-derived cell line	CDKN1A, 1SLC30A1
Topoisomerase Inhibitors	Topoisomerase II inhibitor	Wegner, 2019	30838976	C	Doxorubicin	CRISPR		hTERT-RPE1	CysLTR2, n on-coding regions
Mitotic Inhibitors	Taxanes	Zhao, 2019	31285951	C	Paclitaxel	CRISPRa	Esophageal squamous cell carcinoma	KYSE-180	CDKN1A, ELAVL2, TSPAN4
Mitotic Inhibitors	Taxanes	Whitehurst, 2007	17429401	C	Paclitaxel	RNAi	NSCL	NCI-H1155, HCC366, HCC15, HCC4017	ACRBP, ATP6V0D2, FGD4, HS6ST2, PSMA6, TUBGCP2
Mitotic Inhibitors	Taxanes	Gerhards, 2018	29689640	C	Docetaxel	Gene trap		HAP1	ABCB1, CCNB1, MAD1L1, MAD2L1, and KNTC1
Mitotic Inhibitors	Taxanes	Lau, 2020	32028983	C	Paclitaxel	CRISPR		HAP1	C1orf115
Mitotic Inhibitors	Taxanes	Wei, 2018	31938303	C	27 anti-cancer drugs	CRISPR	Cervical squamous cell carcinoma		ABCC9, IL-37, PPP1R7, PPP2R5B, PPP1R7, and PPP1R11
Mitotic Inhibitors	Taxanes	Lian, 2020	33042272	C	Paclitaxel	CRISPR	Triple-negative breast cancer	MDA-MB-231, MDA-MB-549, MDA-MB-436, MDA-MB-468 and HS-578T	MITR
Mitotic Inhibitors	Taxanes	Rushworth, 2020	33033111	C	Docetaxel	CRISPR	Murine prostate cancer		Tceal1
Antimetabolites	Glucose analogue	Kobayashi, 2015	26403972	C	2DG	RNAi	Cervical, colorectal, NSCL	HeLa, HCT116, H1299	COPB1, ARCN
Antimetabolites	Guanine analog	Carette, 2009	19965467	C	6-thioguanine	Gene trap	CML	KBM7	HPRT
Antimetabolites	Guanine analog	Wang, 2014	24336569	C	6-thioguanine	CRISPR	CML	KBM7	MSH2, MSH6, MLH1, PMS2
Antimetabolites	Guanine analog	Pettitt, 2013	23634208	C	6-thioguanine	PiggyBac	Mouse ESC	HAP-3	Msh2, Msh6, Mlh1
Antimetabolites	Guanine analog	Koike-Yusa, 2014	24535568	C	6-thioguanine	CRISPR	Mouse ESC	JM8	Mlh1, Msh2, Msh6, Pms2, Hprt, GM15293, Letmd1, Olfr815, Prkg1, Tmem8c
Antimetabolites	Pyrimidine antagonist	Kurata, 2016	27808171	C	Cytosine arabinoside	CRISPR	AML	U937	DCK, SLC29A
Antimetabolites	Pyrimidine antagonist	Bester, 2018	29677511	C	Cytosine arabinoside	CRISPRa	AML	MOLM14	GAS6-AS2
Antimetabolites	Pyrimidine antagonist	Xu, 2011	21565176	C	Gemcitabine	RNAi	Cervical	HeLa	SRSF3, SFPQ
Antimetabolites	Pyrimidine antagonist	Fredebohm, 2013	23687379	C	Gemcitabine	RNAi	Pancreatic	BxPC-3, MiaPaca-2	RAD17
Antimetabolites	Pyrimidine antagonist	Xu, 2019	31792210	C	Gemcitabine	CRISPR	Gallbladder	NOZ	ELP5
Antimetabolites	Pyrimidine antagonist	Masoudi, 2019	31844142	C	Gemcitabine	CRISPR	Pancreatic	Panc1	SH3D21
Antimetabolites	Pyrimidine antagonist	Azorsa, 2009	19519883	C	Gemcitabine	RNAi	Pancreatic	MIA PaCa-2	CHK1
Antimetabolites	Pyrimidine antagonist	Giroux, 2006	17012250	C	Gemcitabine	RNAi	Pancreatic	MIA PaCa-2	MAPKAP1, MAK, PAK4, ADRBK1, PIK3CG, DOK1, CSNK1G2, CHK1
Antimetabolites	Pyrimidine antagonist	Wei, 2020	33097661	C	Gemcitabine	CRISPR	Pancreatic	PDX366	PRMT5
antibiotic, immunosupressive and antineoplastic agent		Yamaguchi, 2016	26882569	C	Rapamycin	RNAi	Head and neck squamous cell carcinomas	HN12	Genes involved in ERK pathway
B-cell lymphoma-2 (BCL-2) inhibitors		Chen, 2019	31048321	C	Venetoclax	CRISPR	AML	MOLM13	CLPB, MDM2, MCL1,GID8, BAX, TP53, PMAIP1, SLC25A1, RTN4IP1
B-cell lymphoma-2 (BCL-2) inhibitors		Nechiporuk, 2019	31048320	C	Venetoclax	CRISPR	AML	MOLM13	TP53, BAX, PMAIP1
		Man-Tat Lau, 2020	32028983	C/T	27 anticancer drugs	CRISPR		HAP1	RDD1 (56 genes in total)
		Mills, 2013	23440244	T	ABT-737 (Bcl2 inhibitor)	RNAi	Lymphoma		Dhx9, MCL1
		Lin, 2007	17173063	T	ABT-737 (Bcl2 inhibitor)	RNAi	SCLC	NCI-H196 (and others)	MCL1
		Manguso, 2017	28723893	T	anti-PD-1	CRISPR	Mouse melanoma	B16	CD47
		Schleicher, 2020	33137164	T	ATRi	CRISPR, CRISPRa	Cervical	HeLa, MCF10A	KNTC1, EEF1B2, LUC7L3, SOD2, MED12, RETSAT, LIAS
		Ruiz, 2016	27067599	T	ATRi	CRISPR	Mouse ESC	KH2	CDC25
		Job, 2020	33144657	T	ATRi and CHK1i	CRISPR	Colorectal	DLD-1	POLD1R689W
		Maruyama, 2014	25285958	T	Bicalutamide	RNAi	Prostate	LNCaP	RPL31
		Milosevic, 2013	24403857	T	Erlotinib	RNAi	Pancreatic	BxPC-3, PaTu-8988t	RSK3
		Cruz-Gordillo, 2020	33203722	T	Erlotinib	CRISPR	TNBC	BT20	ELP
		Sudo, 2015	25528770	T	Gefitinib	RNAi	NSCL	H1975	PRKCSH, SIRT3, REP15, MKRN1, KIAA0323, and genes involved in CD27 signaling
		Liu-Sullivan, 2011	22248814	T	GSK461364A	RNAi	NSCL	A549, NCI-H460, NCI-H522, NCI-H322	RARA (and others)
		Lam, 2008	19104039	T	IKK-β inhibitor	RNAi	Diffuse large B-cell lymphoma	OCI-Ly3	IKK-alpha, CARD11
		Carette, 2009	19965467	T	Imatinib	Gene trap	CML	KBM7	NF1, PTPN1, PTPN12
		Shen, 2016	27008852	T	Imatinib	Gene trap	CML	KBM7	CASP10, CUX1, NF1, LYRM9, ZPBP, CEBPG
		Marcotte, 2016	26771497	T	JQ1 (BET-inhibitor)	RNAi	Breast	77 cell lines	PIK3CA mut
		Wetterskog, 2014	23474757	T	Lapatinib	RNAi	Breast (ERBB2-amplified)	HCC202, VP229, HCC1569, MDAMB453, HCC1954, JIMT1 and MDAMB361	NIBP, RAB34, TP53INP1, RAC1, ATP6C1V1, C11ORF73, MLLT6, NUFIP, PROCA1, RAB7L1, RAD21, SCRN2 and SPOP
		Steinhart, 2017	27869803	T	LGK974 (PORCN inhibitor)	CRISPR	Pancreatic ductal carcinoma	RNF43-mut pancreatic ductal cell lines	FZD5
		Sustic, 2018	30482246	T	MEK inhibitors	CRISPR	Colorectal (KRAS-mutant)	LoVo ERN1-KO	ERN1-JNK-JUN pathway
		Heijink, 2015	26598692	T	MK1775 (WEE1 inhibitor)	Gene trap	CML	KBM7	SKP2, CUL1, CDK2 (and others)
		Pettitt, 2013	23634208	T	Olaparib	PiggyBac	Mouse ESC	HAP-3	Parp1
		Hou, 2017	28625976	T	Quizartinib	CRISPR	AML	MV4-11	SPRY3, GSK3
		Sun, 2018	29467456	T	Sorafenib	CRISPR	Hepatocellular carcinoma	Huh7, SMMC-7721	SGOL1
		Zheng, 2019	31903165	T	Sorafenib	CRISPR	Hepatocellular carcinoma	Huh-7 SR	KEAP1
		Wei, 2019	31615983	T	Sorafenib	CRISPR	Hepatocellular carcinoma	MHCC97L	PHGDH
		Pettitt, 2017	28248920	T	Talazoparib (PARP inhibor)	PiggyBac	Mouse ESC (BRCA2-mutant)	H129.2	Ewsr1
		Pettitt, 2018	29748565	T	Talazoparib (PARP inhibor)	CRISPR	Ovarian	Mouse ESC, SUM149	PARP1 point mutation
		Berns, 2007	17936563	T	Trastuzumab	RNAi	Breast (HER2-amplified)	BT474	PTEN
		Berns, 2016	27172896	T	Trastuzumab	RNAi	Breast (HER2-amplified)	BT474, SKBR3, HCC1654	PTEN, ARID1A, ANXA1
		Prahallad, 2012	22281684	T	Vemurafenib	RNAi	Colorectal	WiDr	EGFR
		Prahallad, 2015	26365186	T	Vemurafenib	RNAi	Colorectal	WiDr	PTPN11
		Shalem, 2014	24336571	T	Vemurafenib	CRISPR	Melanoma (BRAF V600E-mutant)	A375	NF1, MED12, NF2, CUL3, TADA1, TADA2B
		Guieze, 2019	31543463	T	Venetoclax	CRISPR	Diffuse large B-cell lymphoma	OCI-Ly1	PRKAR2B, PRKAA2
		Liu, 2019	30026574	T	Pomalidomide (IMMD)	CRISPR	Multiple myeloma	MM1S	CRBN, CSN9
